# Supplementary material
Source: PubMed Central journal article supplement (PMC3822523)
Supplement: NIHMS500903-supplement-3.pdf [file NIHMS500903-supplement-3.pdf]

## ONLINE DATA SUPPLEMENT

**TITLE:** ROLE OF AXL IN EARLY KIDNEY INFLAMMATION AND PROGRESSION OF SALT-DEPENDENT HYPERTENSION

**Short title:** Dual Role of Axl in Hypertension

**Authors:** Sri N. Batchu<sup>1</sup>, Angie Hughson<sup>2</sup>, Janice Gerloff<sup>1</sup>, Deborah J. Fowell<sup>2</sup> and Vyacheslav A. Korshunov<sup>1,\*</sup>

<sup>1</sup>Department of Medicine and Aab Cardiovascular Research Institute, <sup>2</sup>Department of Microbiology and Immunology and David H. Smith Center for Vaccine Biology and Immunology, University of Rochester School of Medicine and Dentistry, Rochester, NY USA

\*To whom correspondence should be addressed:

Vyacheslav “Slava” A. Korshunov, Ph.D.

University of Rochester School of Medicine and Dentistry

Aab Cardiovascular Research Institute

601 Elmwood Ave, Box CVRI

Rochester, NY 14642

Phone: 585 276 9793

Fax: 585 276 9830

E-mail: [Slava\\_Korshunov@urmc.rochester.edu](mailto:Slava_Korshunov@urmc.rochester.edu)

## Materials and Methods

### *Animals*

Axl knockout (Axl<sup>-/-</sup>) mice were used from our colony (express CD45.2 alloantigen in bone marrow (BM) cells). B6.SJL<sup>Ptprc<sup>a</sup>Pep3<sup>b</sup>/BoyJ</sup> mice (express CD45.1 alloantigen in BM cells) were purchased from Jackson Laboratory, bred in house and used as wild types (Axl<sup>+/+</sup>)<sup>1</sup>. All experiments were conducted in male mice (6weeks old) and were approved by the University of Rochester Animal Care Committee in accordance with the Use of Laboratory Animals guidelines of the National Institutes of Health and American Heart Association (UCAR #2003-206R).

### *Bone marrow transplant*

Bone marrow transplant (BMT) experiments between Axl<sup>+/+</sup> and Axl<sup>-/-</sup> were done as we recently described<sup>1</sup>. Donor-derived BM cells (Axl<sup>+/+</sup> or Axl<sup>-/-</sup>) were injected ( $6 \times 10^6$ ) into recipient mice after irradiation. Chimeric mice were allowed to recover for six weeks before experimentation.

### *A model of DOCA-salt hypertension*

We used a previously described DOCA-salt mouse model of hypertension<sup>2</sup>. Briefly, upon successful engraftment of the donor BM (>90%) Axl chimeric mice were anesthetized with a cocktail of ketamine and xylazine (130 and 9 mg/kg, i.p.). An incision was made to expose the left kidney, which was ligated and removed. At the time of surgery a 75mg DOCA pellet (60 days release, Innovative Research of America, USA) was placed subcutaneously in a lateral area on the back of chimeras. Subsequently, animals were injected with analgesic Flunixin meglumine (120mg/kg, i.p.) and given regular chow and a 1% NaCl solution as a drinking water. Systolic BP was measured weekly for 6week time-course using a non-invasive tail-cuff method plethysmography (Visitech System, USA). Kidney function in Axl chimeras was measured after 1week after induction of DOCA-salt. Total protein (Bradford assay) and albumin (ELISA kit, Exocell, USA) were measured in urine samples from Axl chimeras that were collected in metabolic cages for 24hrs.

### *Isolation of immune cells from peripheral tissues*

Peripheral blood was collected into heparinized tubes from the mandibular vein and incubated with ACK lysis buffer for 5min to lyse the erythrocytes. Splenocytes were obtained by tearing the spleen in a 70 $\mu$ m cell strainer. Kidneys from Axl chimeras were harvested, placed in the 100 $\mu$ m cell strainer (BD Falcon) and mashed in RPMI media supplemented with 10% FBS (Hyclone). The resulted homogenates were centrifuged (1,300rpm, 4°C, 6min) and the cell pellet was re-suspended in RPMI media with 1% FBS, 100 $\mu$ g collagenase (Worthington) and incubated for 30min at 37°C in a fully humidified atmosphere with 95% O<sub>2</sub>/5% CO<sub>2</sub>. The digested solution was again centrifuged and the pellet with cells was gently re-constituted in 1mL PBS with 3% FBS.

### *Flow cytometry*

The engraftment of donor BM cells was confirmed by staining of the blood samples after recovery period (6wk) with a cocktail of CD45.1-FITC and CD45.2-PE antibodies (1:500, eBiosciences) and analyzed using 4-color BD Accuri C6 flow cytometer (BD Biosciences). Five major subsets of immune cells were detected using 12-color LSR II flow cytometer (BD Bioscience) and shown in the Figure 3A. Isolated cells from spleen or kidney of Axl chimeras were first incubated with live/dead stain (1:500, Invitrogen). Following this step, the cells were washed with FACS buffer (1,200rpm, 4°C, 6min) and incubated with FC block (1:10, BD Bioscience) at room temperature for 30min. Then cells were stained with a cocktail containing

CD45.1-FITC (1:1000, eBioscience), CD45.2-PE (1:500, eBioscience), CD3-APC (1:200, eBioscience), CD19-PE-CYC (1:500, eBioscience), CD11b-PE-CY5.5 (1:500, BD Bioscience), CD11c-PE-TXR (1:500, Invitrogen) and NK1.1-APC-CY7 (1:100, Biolegend) antibodies at 4°C for 30min. Cells were washed and re-suspended in FACS buffer. Compensation controls were prepared using anti-rat/hamster IgGκ beads for single stained controls and live/dead beads. Flow cytometry analyses were performed using FlowJo software version 7.6.3.

#### *Quantitative RT-PCR*

In a separate set of Axl chimeras, left kidneys were harvested during surgery and right kidney after 1 week of DOCA-salt treatment and were immediately frozen in liquid nitrogen (Ref). RNA was isolated and amplified to cDNA with a NuGEN (San Carlos, CA) Ovation RNA amplification system V2. The cDNA samples were assayed for Axl, Gas6, and GAPDH expression. Inflammatory cytokines and receptors were assessed using a mouse PCR Array (PAMM-011; Qiagen). The list of 84 studied genes is shown in Table S1. Bioinformatics analyses of gene expression profiles from kidneys across Axl chimeras were performed as previously described<sup>1</sup>.

#### *Morphometry and immunohistochemistry*

Axl chimeras were perfusion fixed with 10% paraformaldehyde and histology was performed as described<sup>2</sup>. Apoptotic cells were detected in Axl chimeras with ApopTag peroxidase In situ Apoptosis Detection Kit (Chemicon Int) as reported<sup>2</sup>. Oxidative stress was assessed in the kidneys using OxyIHC Oxidative Stress Detection Kit (Millipore). We used MCID image software (MCID Elite 6.0, Imaging Research) for morphometry and ROS analyses as shown previously<sup>3</sup>.

#### *Statistical analysis*

Results are shown as means±SEM. Statistical differences were evaluated using JMP5.1.2 software. Differences between two groups were analyzed by pooled Student's *t* test. For more than 3 experimental groups we utilized one-way ANOVA or Wilcoxon test followed by post hoc comparisons. The level of  $p < 0.05$  was regarded as significant.

## **References**

1. Gerloff J, Korshunov VA. Immune modulation of vascular resident cells by axl orchestrates carotid intima-media thickening. *The American journal of pathology*. 2012;180:2134-2143.
2. Korshunov VA, Daul M, Massett MP, Berk BC. Axl mediates vascular remodeling induced by deoxycorticosterone acetate salt hypertension. *Hypertension*. 2007;50:1057-1062.
3. Korshunov VA, Nikonenko TA, Tkachuk VA, Brooks A, Berk BC. Interleukin-18 and macrophage migration inhibitory factor are associated with increased carotid intima-media thickening. *Arteriosclerosis, thrombosis, and vascular biology*. 2006;26:295-300.

**Table S1.** The list of the genes on mouse inflammatory cytokines & receptors PCR array (PAMM-011)

| <b>Gene Symbol</b> | <b>Description</b>                                   | <b>Gene Symbol</b> | <b>Description</b>                                    |
|--------------------|------------------------------------------------------|--------------------|-------------------------------------------------------|
| Abcf1              | ATP-binding cassette, sub-family F (GCN20), member 1 | Cxcr3              | Chemokine (C-X-C motif) receptor 3                    |
| Bcl6               | B-cell leukemia/lymphoma 6                           | Ccr10              | Chemokine (C-C motif) receptor 10                     |
| Cxcr5              | Chemokine (C-X-C motif) receptor 5                   | Ifng               | Interferon gamma                                      |
| C3                 | Complement component 3                               | Il10               | Interleukin 10                                        |
| Casp1              | Caspase 1                                            | Il10ra             | Interleukin 10 receptor, alpha                        |
| Ccl1               | Chemokine (C-C motif) ligand 1                       | Il10rb             | Interleukin 10 receptor, beta                         |
| Ccl11              | Chemokine (C-C motif) ligand 11                      | Il11               | Interleukin 11                                        |
| Ccl12              | Chemokine (C-C motif) ligand 12                      | Il13               | Interleukin 13                                        |
| Ccl17              | Chemokine (C-C motif) ligand 17                      | Il13ra1            | Interleukin 13 receptor, alpha 1                      |
| Ccl19              | Chemokine (C-C motif) ligand 19                      | Il15               | Interleukin 15                                        |
| Ccl2               | Chemokine (C-C motif) ligand 2                       | Il16               | Interleukin 16                                        |
| Ccl20              | Chemokine (C-C motif) ligand 20                      | Il17b              | Interleukin 17B                                       |
| Ccl22              | Chemokine (C-C motif) ligand 22                      | Il18               | Interleukin 18                                        |
| Ccl24              | Chemokine (C-C motif) ligand 24                      | Il1a               | Interleukin 1 alpha                                   |
| Ccl25              | Chemokine (C-C motif) ligand 25                      | Il1b               | Interleukin 1 beta                                    |
| Ccl3               | Chemokine (C-C motif) ligand 3                       | Il1f6              | Interleukin 1 family, member 6                        |
| Ccl4               | Chemokine (C-C motif) ligand 4                       | Il1f8              | Interleukin 1 family, member 8                        |
| Ccl5               | Chemokine (C-C motif) ligand 5                       | Il1r1              | Interleukin 1 receptor, type I                        |
| Ccl6               | Chemokine (C-C motif) ligand 6                       | Il1r2              | Interleukin 1 receptor, type II                       |
| Ccl7               | Chemokine (C-C motif) ligand 7                       | Il20               | Interleukin 20                                        |
| Ccl8               | Chemokine (C-C motif) ligand 8                       | Il2rb              | Interleukin 2 receptor, beta chain                    |
| Ccl9               | Chemokine (C-C motif) ligand 9                       | Il2rg              | Interleukin 2 receptor, gamma chain                   |
| Ccr1               | Chemokine (C-C motif) receptor 1                     | Il3                | Interleukin 3                                         |
| Ccr2               | Chemokine (C-C motif) receptor 2                     | Il4                | Interleukin 4                                         |
| Ccr3               | Chemokine (C-C motif) receptor 3                     | Il5ra              | Interleukin 5 receptor, alpha                         |
| Ccr4               | Chemokine (C-C motif) receptor 4                     | Il6ra              | Interleukin 6 receptor, alpha                         |
| Ccr5               | Chemokine (C-C motif) receptor 5                     | Il6st              | Interleukin 6 signal transducer                       |
| Ccr6               | Chemokine (C-C motif) receptor 6                     | Il8rb              | Interleukin 8 receptor, beta                          |
| Ccr7               | Chemokine (C-C motif) receptor 7                     | Itgam              | Integrin alpha M                                      |
| Ccr8               | Chemokine (C-C motif) receptor 8                     | Itgb2              | Integrin beta 2                                       |
| Ccr9               | Chemokine (C-C motif) receptor 9                     | Lta                | Lymphotoxin A                                         |
| Crp                | C-reactive protein, pentraxin-related                | Ltb                | Lymphotoxin B                                         |
| Cx3cl1             | Chemokine (C-X3-C motif) ligand 1                    | Mif                | Macrophage migration inhibitory factor                |
| Cxcl1              | Chemokine (C-X-C motif) ligand 1                     | Scye1              | Small inducible cytokine subfamily E, member 1        |
| Cxcl10             | Chemokine (C-X-C motif) ligand 10                    | Spp1               | Secreted phosphoprotein 1                             |
| Cxcl11             | Chemokine (C-X-C motif) ligand 11                    | Tgfb1              | Transforming growth factor, beta 1                    |
| Cxcl12             | Chemokine (C-X-C motif) ligand 12                    | Tnf                | Tumor necrosis factor                                 |
| Cxcl13             | Chemokine (C-X-C motif) ligand 13                    | Tnfrsf1a           | Tumor necrosis factor receptor superfamily, member 1a |
| Cxcl15             | Chemokine (C-X-C motif) ligand 15                    | Tnfrsf1b           | Tumor necrosis factor receptor superfamily, member 1b |
| Pf4                | Platelet factor 4                                    | Cd40lg             | CD40 ligand                                           |
| Cxcl5              | Chemokine (C-X-C motif) ligand 5                     | Tollip             | Toll interacting protein                              |
| Cxcl9              | Chemokine (C-X-C motif) ligand 9                     | Xcr1               | Chemokine (C motif) receptor 1                        |

**Table S2.** Up-regulated immune pathways in Axl<sup>-/-</sup> → Axl<sup>+/+</sup> compared to Axl<sup>-/-</sup> → Axl<sup>-/-</sup> or Axl<sup>+/+</sup> → Axl<sup>+/+</sup> in kidneys after 1 week of DOCA-salt

| <b>Pathway ID</b> | <b>Pathway Name</b>                                                                                                                  | <b>Gene Symbols</b>          |
|-------------------|--------------------------------------------------------------------------------------------------------------------------------------|------------------------------|
| 4351              | Chemokine signaling pathway                                                                                                          | Ccl22; Ccl24                 |
| 604               | Cytokine-cytokine receptor interaction                                                                                               | Ccl22; Ccl24; 117b; Lta; Ltb |
| 10166             | Heterotrimeric GPCR signaling pathway (through G alpha i and pertussis toxin)                                                        | Lta                          |
| 9890              | Heterotrimeric GPCR signaling pathway (through G alpha q, PLC beta and ERK cascade)                                                  | Lta                          |
| 9827              | Heterotrimeric GPCR signaling pathway (through G alpha s ACs Epac BRaf and ERK cascade)                                              | Lta                          |
| 9754              | Heterotrimeric GPCR signaling pathway (through G alpha s ACs PKA BRaf and ERK cascade)                                               | Lta                          |
| 9794              | Heterotrimeric GTP-binding protein coupled receptor signaling pathway (through G alpha i, adenylate cyclase and cAMP)                | Lta                          |
| 9789              | Heterotrimeric GTP-binding protein coupled receptor signaling pathway (through G alpha s, cholera toxin, adenylate cyclase and cAMP) | Lta                          |
| 10320             | JAK-STAT pathway and regulation pathway                                                                                              | Lta                          |
| 637               | Type I diabetes mellitus                                                                                                             | Lta                          |

**Table S3.** Down-regulated immune pathways in Axl<sup>-/-</sup> → Axl<sup>+/+</sup> compared to Axl<sup>-/-</sup> → Axl<sup>-/-</sup> or Axl<sup>+/+</sup> → Axl<sup>+/+</sup> kidneys after 1 week of DOCA-salt

| <b>Pathway ID</b> | <b>Pathway Name</b>                                                                                                                  | <b>Gene Symbols</b>                              |
|-------------------|--------------------------------------------------------------------------------------------------------------------------------------|--------------------------------------------------|
| 4351              | Chemokine signaling pathway                                                                                                          | Ccl8; Ccl4; Cxcl9; Ccl3; Il3; Cxcl9; Cxcr5; Ccl3 |
| 604               | Cytokine-cytokine receptor interaction                                                                                               | Ccl8; Il2rb; Ifng; Cxcr5; Il3; Cd40lg            |
| 699               | Toll-like receptor signaling pathway                                                                                                 | Ccl4; Cxcl9; Ccl3                                |
| 10401             | Chagas disease (American trypanosomiasis)                                                                                            | C3; Ccl3; Ifng                                   |
| 759               | Apoptosis                                                                                                                            | Il3                                              |
| 2791              | Asthma                                                                                                                               | Il3; Cd40lg                                      |
| 10166             | Heterotrimeric GPCR signaling pathway (through G alpha i and pertussis toxin)                                                        | Il3; Ifng; Cd40lg;                               |
| 9890              | Heterotrimeric GPCR signaling pathway (through G alpha q, PLC beta and ERK cascade)                                                  | Il3; Ifng; Cd40lg                                |
| 9827              | Heterotrimeric GPCR signaling pathway (through G alpha s ACs Epac Braf and ERK cascade)                                              | Il3; Ifng; Il3; Cd40lg                           |
| 9754              | Heterotrimeric GPCR signaling pathway (through G alpha s ACs PKA Braf and ERK cascade)(canonical)                                    | Il3; Ifng; Il3; Cd40lg                           |
| 9794              | Heterotrimeric GTP-binding protein coupled receptor signaling pathway (through G alpha i, adenylate cyclase and cAMP)                | Il3; Ifng; Cd40lg; Il3; Ifng; Il3;               |
| 9789              | Heterotrimeric GTP-binding protein coupled receptor signaling pathway (through G alpha s, cholera toxin, adenylate cyclase and cAMP) | Cd40lg                                           |
| 9841              | IL-3 signaling pathway (JAK1 JAK2 STAT5) (IL-3 signaling (JAK1 JAK2 STAT5))                                                          | Il3                                              |
| 10320             | JAK-STAT pathway and regulation pathway                                                                                              | Il3; Ifng; Il2rb                                 |
| 10402             | African trypanosomiasis                                                                                                              | Ifng                                             |
| 2794              | Allograft rejection                                                                                                                  | Ifng; Cd40lg                                     |
| 692               | T cell receptor signaling pathway                                                                                                    | Ifng; Cd40lg                                     |
| 2816              | Autoimmune thyroid disease                                                                                                           | Cd40lg                                           |
| 8107              | Intestinal immune network for IgA production                                                                                         | Cd40lg                                           |
| 2817              | Primary immunodeficiency                                                                                                             | Cd40lg                                           |
| 8115              | Viral myocarditis                                                                                                                    | Cd40lg                                           |

**Table S4.** Down-regulated immune pathways that were specific to Axl<sup>-/-</sup> → Axl<sup>+/+</sup> in kidneys after 1 week of DOCA-salt

| <b>Pathway ID</b> | <b>Pathway Name</b>                                                                   | <b>Gene Symbols</b> |
|-------------------|---------------------------------------------------------------------------------------|---------------------|
| 10360             | Leishmaniasis                                                                         | C3; Ifng            |
| 708               | Fc epsilon RI signaling pathway                                                       | Il3; Il3            |
| 682               | Hematopoietic cell lineage                                                            | Il3                 |
| 10368             | Amoebiasis                                                                            | Ifng                |
| 687               | Antigen processing and presentation                                                   | Ifng                |
| 2802              | Graft-versus-host disease                                                             | Ifng                |
| 9892              | IFN gamma signaling pathway (JAK1 JAK2 STAT1) (IFN gamma signaling (JAK1 JAK2 STAT1)) | Ifng                |
| 716               | Natural killer cell mediated cytotoxicity                                             | Ifng                |
| 10372             | Osteoclast differentiation                                                            | Ifng                |
| 630               | Proteasome                                                                            | Ifng                |
| 655               | Regulation of autophagy                                                               | Ifng                |
| 2813              | Systemic lupus erythematosus                                                          | Ifng; Cd40lg        |
| 633               | TGF-beta signaling pathway                                                            | Ifng                |
| 759               | Apoptosis                                                                             | Il3                 |

**Table S5.** Morphometry analyses of arteries from Axl chimeras after 6weeks of DOCA-salt

| <b>Vessel area,<br/>x10<sup>3</sup> μm<sup>2</sup></b> | <b>Axl+/+ →Axl+/+,<br/>n=5</b> | <b>Axl-/- →Axl-/-,<br/>n=6</b> | <b>Axl-/- →Axl+/+,<br/>n=6</b> | <b>Axl+/+ →Axl-/-,<br/>n=6</b> |
|--------------------------------------------------------|--------------------------------|--------------------------------|--------------------------------|--------------------------------|
| Mesenteric artery                                      |                                |                                |                                |                                |
| Lumen                                                  | 11.8 ± 2.1                     | 13.6 ± 1.9                     | 16.3 ± 1.9                     | 15.3 ± 2.1                     |
| Media                                                  | 6.9 ± 0.8                      | 5.7 ± 0.8                      | 6.0 ± 0.8                      | 7.9 ± 0.8                      |
| Adventitia                                             | 6.4 ± 0.8                      | 5.2 ± 0.7                      | 6.1 ± 0.7                      | 7.9 ± 0.7                      |
| Thoracic aorta                                         |                                |                                |                                |                                |
| Lumen                                                  | 282 ± 38                       | 195 ± 35                       | 201 ± 35                       | 160 ± 35                       |
| Media                                                  | 138 ± 11                       | 144 ± 11                       | 104 ± 11 †,‡                   | 128 ± 11                       |
| Adventitia                                             | 77 ± 7                         | 62 ± 6                         | 59 ± 6                         | 67 ± 6                         |

Values are means±SEM. †, p<0.05 vs. Axl+/+ →Axl+/+. ‡, p<0.05 vs. Axl-/- →Axl-/. n, Number per group.



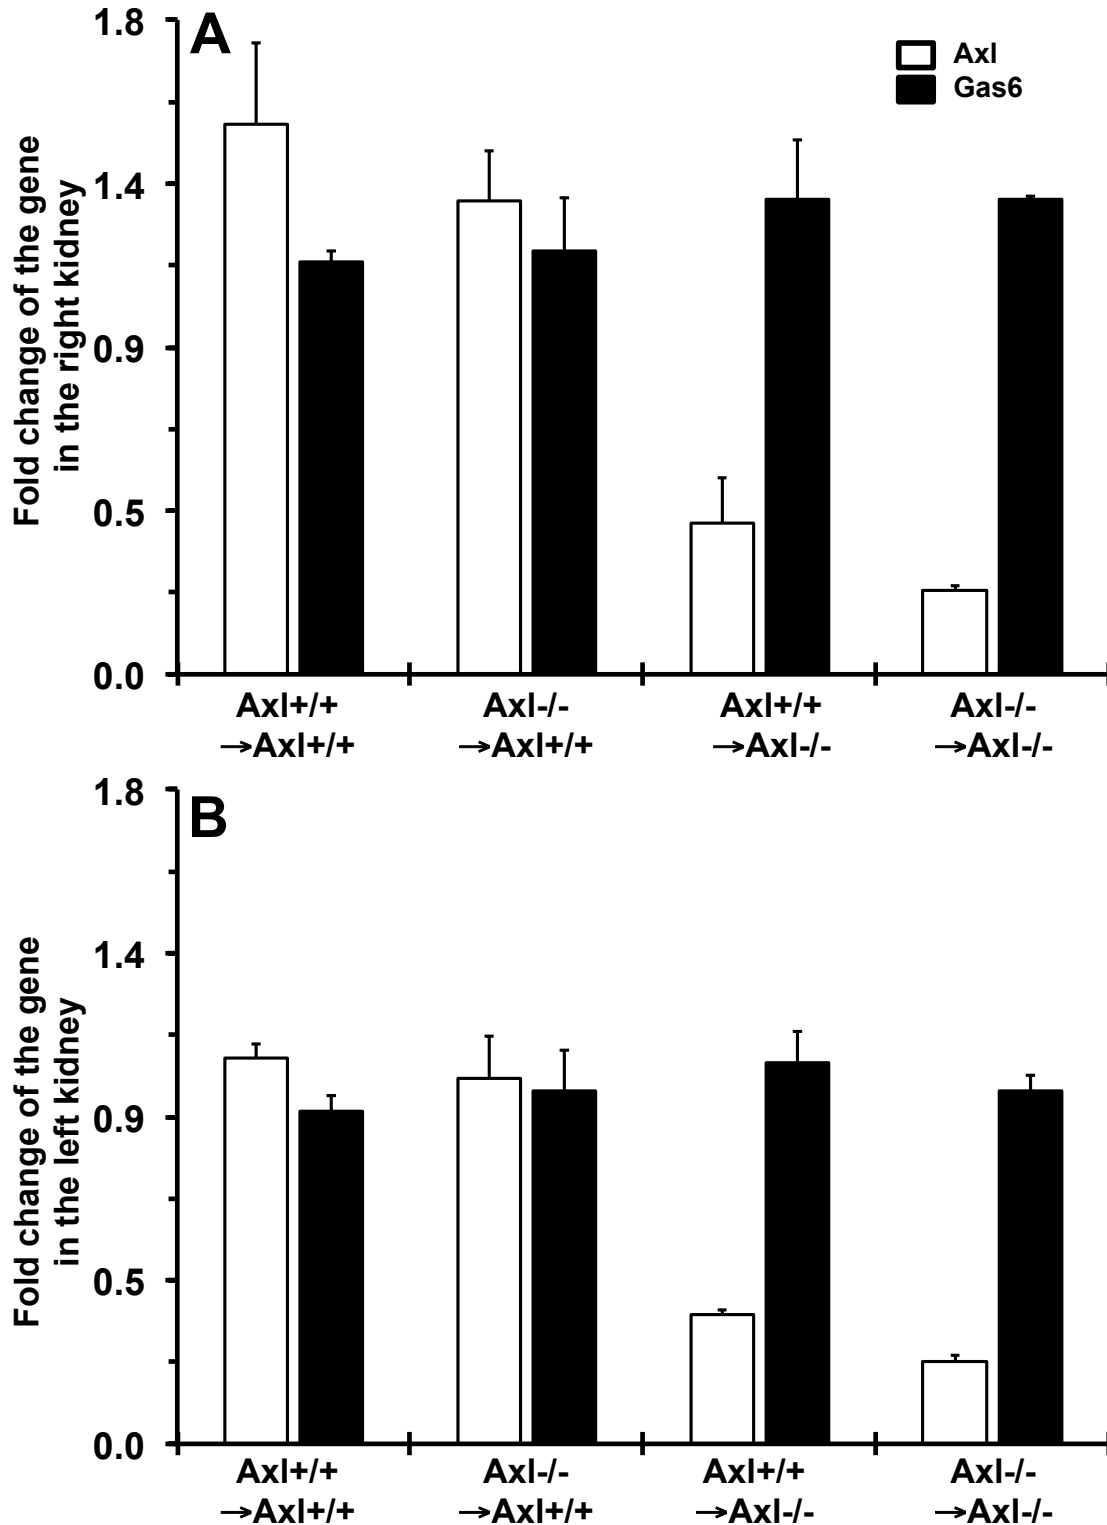

**Figure S1.** Axl and Gas6 gene expression in the kidneys from Axl chimeras. **A.** Right kidneys from Axl chimeras after 1 week of DOCA-salt. **B.** Left kidneys from Axl chimeras collected at the time of nephrectomy. Open bars represent Axl expression. Black bars - Gas6 expression. We assayed two-three kidneys from each experimental group.

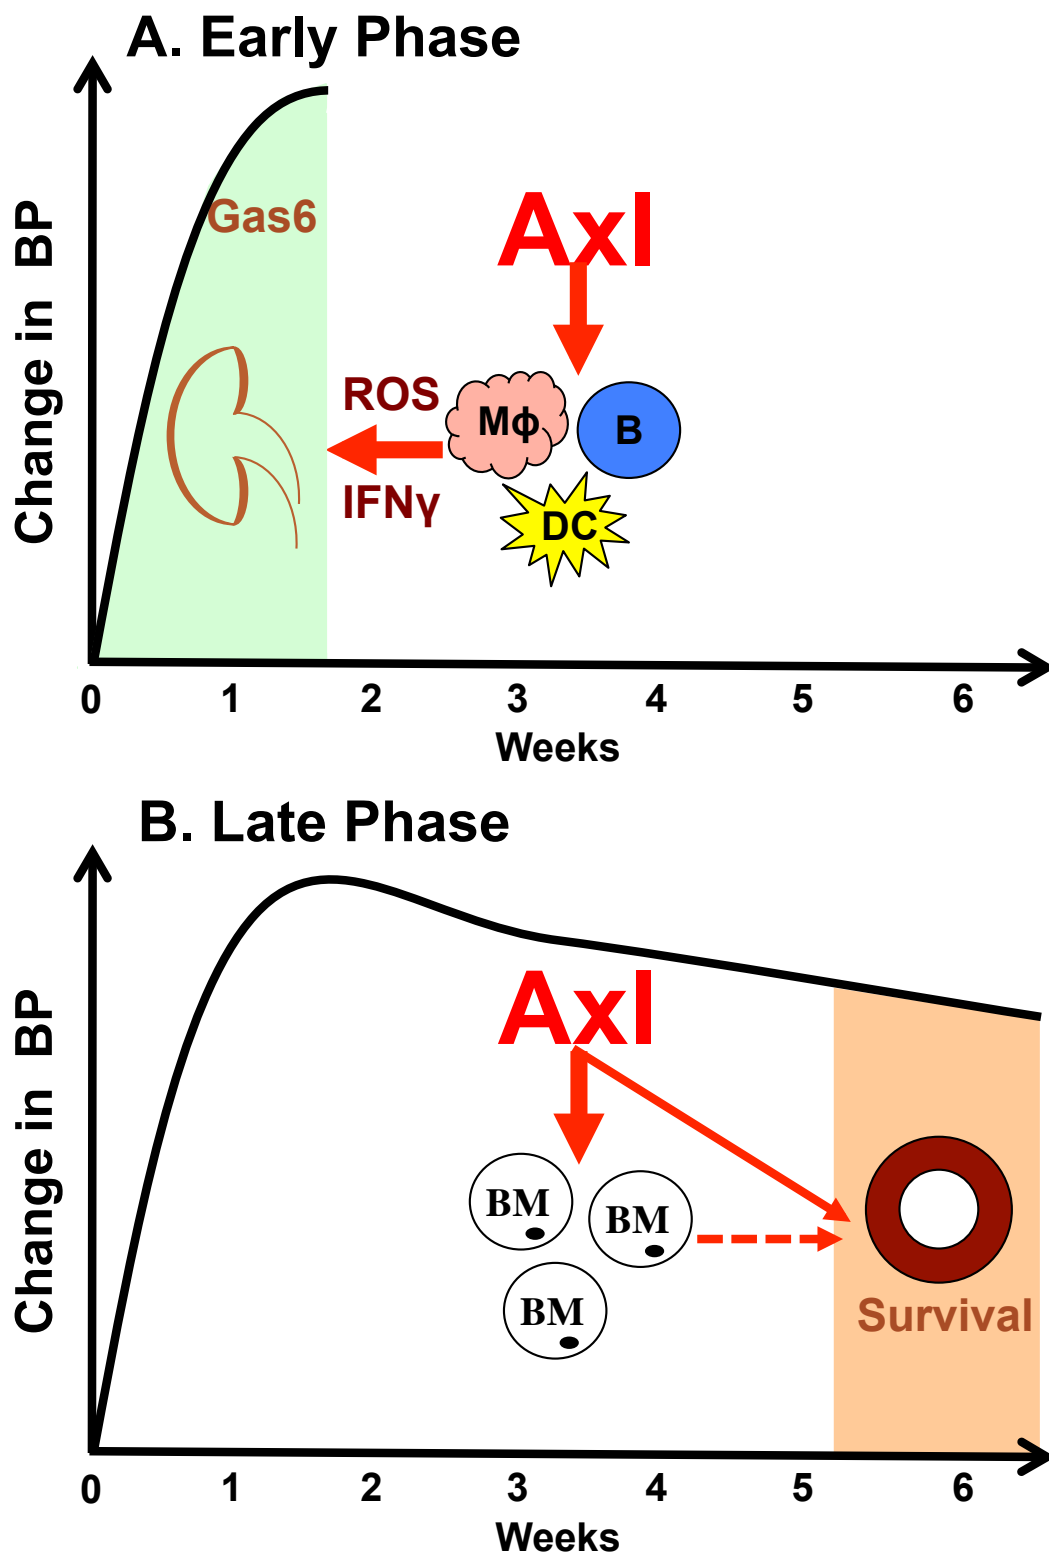

**Figure S2.** Proposed model on dual roles of Axl in progression of salt-dependent hypertension. Black line show changes in blood pressure (BP) . X-axis shows time in weeks. Y-axis changes in BP. **A.** During early phase-light green color. **B.** During late phase-light brown color. M $\phi$ , macrophages -pink; DC, Dendritic cells-yellow color; B, B lymphocytes-blue color; BM, Bone marrow-derived cells -white; ROS, reactive oxygen species; IFN $\gamma$ , Interferone gamma.
